# Supplementary material
Source: Royal Society of Chemistry journal article supplement (doi:10.1039/d5va00376h)
Supplement: d5va00376h2.pdf [file d5va00376h2.pdf]

## Psychometric structure and scoring system for a part of the Questionnaire

### KNOWLEDGE subscores scales

| SUBSCALE variables                                                                  | No. items | Score range   | Score calculation from items                                               |
|-------------------------------------------------------------------------------------|-----------|---------------|----------------------------------------------------------------------------|
| Plastics 1 ( <b>P1</b> ), Overall characteristics                                   | 6         | from -1 to +1 | $(Q10 + Q12a + Q12b + Q12c + Q12d + Q12e)/6$                               |
| Plastics 2 ( <b>P2</b> ), Advantages                                                | 5         | from -1 to +1 | $(Q11a + Q11b + Q11c + Q11d + Q11g)/5$                                     |
| Plastics 3 ( <b>P3</b> ), disadvantages                                             | 4         | from -1 to +1 | $(Q11e + Q11f + Q11h + Q13)/4$                                             |
| Plastics 4 ( <b>P4</b> ), pittogrammes                                              | 4         | from -1 to +1 | $(Q37 + Q38 + Q39 + Q40) / 4$                                              |
| Micro/Nanoplastics ( <b>MN1</b> ), definition and sources                           | 10        | from -1 to +1 | $(Q16a + Q16b + Q16c + Q16d + Q16e + Q16f + Q16g + Q16h + Q16i + Q16j)/10$ |
| Micro/Nanoplastics ( <b>MN2</b> ), contaminated environmental matrices              | 6         | from -1 to +1 | $(Q17a + Q17b + Q17c + Q17d + Q17e + Q17f)/6$                              |
| Micro/Nanoplastics ( <b>MN3</b> ), contaminated foods                               | 8         | from -1 to +1 | $(Q18a + Q18b + Q18c + Q18d + Q18e + Q18f + Q18g + Q18h)/8$                |
| Micro/Nanoplastics ( <b>MN4</b> ), way to enter in human body and general toxicity  | 4         | from -1 to +1 | $(Q21a + Q21b + Q21c + Q21d + Q22)/4$                                      |
| Micro/Nanoplastics ( <b>MN5</b> ), organs and body systems toxicity (Microplastics) | 7         | from -1 to +1 | $(Q23a + Q23b + Q23c + Q23d + Q23e + Q23f + Q23g)/7$                       |
| Micro/Nanoplastics ( <b>MN6</b> ), organs and body systems toxicity (Nanoplastics)  | 7         | from -1 to +1 | $(Q24a + Q24b + Q24c + Q24d + Q24e + Q24f + Q24g)/7$                       |
| Micro/Nanoplastics ( <b>MN7</b> ), risk of carcinogenicity                          | 3         | from -1 to +1 | $(Q25 + Q26 + Q27)/3$                                                      |

Categories of correctness for knowledge subscales used in comparison analyses:

|           |                       |
|-----------|-----------------------|
| Excellent | score > +0.50         |
| Good      | +0.25 < score ≤ +0.50 |
| Moderate  | 0.00 < score ≤ +0.25  |
| Poor      | -0.25 < score ≤ 0.00  |
| Very Poor | score ≤ -0.25         |

## RISK PERCEPTION subscales scores

| <b>SUBSCALES variables</b> | <b>No. items</b> | <b>Score range</b> | <b>Score calculation</b>                 |
|----------------------------|------------------|--------------------|------------------------------------------|
| DREAD                      | 3                | from 1 to 5        | $(Q35c + Q35d + Q35e) / 3$               |
| KNOWLEDGE                  | 5                | from 1 to 5        | $(Q35a + Q35b + Q35g + Q35h + Q35i) / 5$ |

Note: from the original structure of Question #35, after internal consistency analysis (Cronbac's Alpha) and Explorative Factor Analysis, three items were excluded (Q35f, Q35j, Q35k) as explained in the manuscript (Table 3).
