# Supplementary material
Source: Royal Society of Chemistry journal article supplement (doi:10.1039/d5va00376h)
Supplement: d5va00376h3.pdf [file d5va00376h3.pdf]

**Table S3-1** Actual knowledge about plastics

|                                                                                                      | %       |
|------------------------------------------------------------------------------------------------------|---------|
| <b>Q 10.</b> <i>How many types of plastics exist?</i>                                                |         |
| More than 5                                                                                          | 18.8    |
| More than 10                                                                                         | 18.8    |
| More than 15                                                                                         | 25.6    |
| I am not sure                                                                                        | 36.8    |
| <b>Q 12.</b> <i>Which of the following objects/materials are plastic products?</i>                   | ('yes') |
| Bottles of soft drinks (e.g., orange soda, fruit juices, cola, etc.)                                 | 98.8    |
| Computer keyboards and mouse                                                                         | 94.5    |
| Synthetic tissues                                                                                    | 87.7    |
| Some paints                                                                                          | 78.5    |
| Plexiglass                                                                                           | 87.7    |
| <b>Q 13.</b> <i>How long does it take for a plastic bottle left in the environment to decompose?</i> |         |
| In 50 years                                                                                          | 5.4     |
| Between 50 and 100 years                                                                             | 16.2    |
| Between 100 and 250 years                                                                            | 28.3    |
| Between 250 and 400 years                                                                            | 13.8    |
| Between 400 and 500 years                                                                            | 22.5    |
| I am not sure                                                                                        | 13.8    |

| <b>Q 11.</b> <i>Which of the following statements about advantages/disadvantages apply to PLASTIC</i> | True (%) | False (%) | I'm not sure (%) |
|-------------------------------------------------------------------------------------------------------|----------|-----------|------------------|
| Its production is more cost-effective than other materials (e.g. iron, wood)                          | 54.6%    | 22.3%     | 23.1%            |
| It's light                                                                                            | 85.0%    | 6.8%      | 8.1%             |
| It's recyclable                                                                                       | 88.2%    | 8.4%      | 3.4%             |
| Can it be of any colour                                                                               | 71.9%    | 10.2%     | 17.9%            |
| It is challenging to degrade                                                                          | 87.5%    | 9.2%      | 3.4%             |
| It is bioaccumulated in living beings                                                                 | 82.7%    | 2.5%      | 14.8%            |
| Resistant to corrosion                                                                                | 50.1%    | 29.5%     | 11.4%            |
| Its production and disposal cause large quantities of greenhouse gases to be emitted.                 | 77.5%    | 4.7%      | 17.8%            |

| <i>Have you ever heard of ... ?</i> | YES   | NO    | I'm not sure |
|-------------------------------------|-------|-------|--------------|
| <b>Q 14.</b> Microplastics          | 83.7% | 12.5% | 3.8%         |
| <b>Q 15.</b> Nanoplastics           | 65.5% | 28.6% | 5.9%         |

| <b>Q 16.</b> Quali delle seguenti affermazioni sulle micro/nanoplastiche sono corrette?   | True (%) | False (%) | I'm not sure (%) |
|-------------------------------------------------------------------------------------------|----------|-----------|------------------|
| Microplastics are particles smaller than 5 millimeters in size                            | 62.9%    | 8.3%      | 28.8%            |
| Nanoplastics are particles larger than 5 millimeters in size                              | 8.9%     | 64.0%     | 27.1%            |
| Microplastics can be released from exfoliating cosmetic products                          | 51.7%    | 5.9%      | 42.4%            |
| Microplastics can be released from toothpaste                                             | 47.0%    | 9.0%      | 44.0%            |
| Microplastics can be released from synthetic fabrics during washing                       | 71.2%    | 3.4%      | 25.4%            |
| Microplastics can be released from tires rubbing against the road                         | 61.9%    | 3.0%      | 35.2%            |
| Microplastics can be released from road marking paints                                    | 46.8%    | 5.1%      | 48.1%            |
| Microplastics can be released into the environment from decomposing plastic bottles       | 75.3%    | 3.0%      | 20.8%            |
| Microplastics can be released from paints used on ship hulls                              | 58.3%    | 3.0%      | 38.7%            |
| Microplastics can be released from products used in manufacturing (e.g., plastic pellets) | 74.9%    | 1.3%      | 23.8%            |

| <b>Q 17.</b> Which environmental matrices are MICROPLASTICS / NANOPLASTICS likely to be found through laboratory analysis? | YES (%) | NO (%) | I'm not sure (%) |
|----------------------------------------------------------------------------------------------------------------------------|---------|--------|------------------|
| Sea waters                                                                                                                 | 91.1%   | 0.4%   | 7.5%             |
| Freshwaters                                                                                                                | 83.1%   | 4.7%   | 12.3%            |
| Uncultivated land                                                                                                          | 64.6%   | 13.5%  | 21.9%            |
| Cultivated land                                                                                                            | 79.5%   | 3.8%   | 16.7%            |
| Countryside air                                                                                                            | 45.6%   | 22.8%  | 31.7%            |
| Urban air                                                                                                                  | 79.4%   | 3.8%   | 16.8%            |

| <b>Q 18.</b> In your opinion, which of the following foods are likely to contain MICROPLASTICS/NANOPLASTICS when analysed in a laboratory? | YES (%) | NO (%) | I'm not sure (%) |
|--------------------------------------------------------------------------------------------------------------------------------------------|---------|--------|------------------|
| Meat                                                                                                                                       | 67.9%   | 8.8%   | 23.3%            |
| Fish                                                                                                                                       | 91.7%   | 0.4%   | 7.9%             |
| Fruit                                                                                                                                      | 43.9%   | 26.6%  | 29.5%            |
| Vegetables                                                                                                                                 | 59.4%   | 15.9%  | 24.7%            |
| Cereals                                                                                                                                    | 47.9%   | 18.6%  | 33.5%            |
| Milk and derivatives                                                                                                                       | 61.7%   | 11.8%  | 26.5%            |
| Bottled water                                                                                                                              | 77.8%   | 8.8%   | 13.4%            |
| Tap water                                                                                                                                  | 49.6%   | 16.1%  | 34.3%            |

| <i>Are there specific regulations concerning the amount of MICROPLASTICS and/or NANOPLASTICS in the ENVIRONMENT (national or European level)?</i> | YES (%) | NO (%) | I'm not sure (%) |
|---------------------------------------------------------------------------------------------------------------------------------------------------|---------|--------|------------------|
| <b>Q 19.</b> In the ENVIRONMENT                                                                                                                   | 38.9%   | 10.5%  | 50.6%            |
| <b>Q 20.</b> IN FOODS                                                                                                                             | 30.1%   | 12.6%  | 49.4%            |

| <b>Q 21.</b> Which of the following ways can plastic enter the human body? | YES (%) | NO (%) | I'm not sure (%) |
|----------------------------------------------------------------------------|---------|--------|------------------|
| Dermal contact                                                             | 39.7%   | 28.5%  | 31.8%            |
| Inhalation                                                                 | 74.4%   | 7.1%   | 18.5%            |
| Oral intake                                                                | 91.1%   | 1.3%   | 7.6%             |

| <b>Q 22.</b>                                                           | YES (%) | NO (%) |
|------------------------------------------------------------------------|---------|--------|
| <i>Can microplastics introduced into the human body damage health?</i> | 89.2%   | 10.8%  |

| <b>Q 23.</b> Which organs/systems can MICROPLASTICS have toxic effects on humans and other living species? (more than one answer possible)? | YES (%) | NO (%) | I'm not sure (%) |
|---------------------------------------------------------------------------------------------------------------------------------------------|---------|--------|------------------|
| Endocrine system                                                                                                                            | 68.6%   | 6.8%   | 24.6%            |
| Liver                                                                                                                                       | 77.4%   | 5.2%   | 17.5%            |
| Kidney                                                                                                                                      | 82.2%   | 3.3%   | 14.6%            |
| Sight                                                                                                                                       | 24.2%   | 24.2%  | 51.7%            |
| Hypercholesterolemia                                                                                                                        | 26.3%   | 19.1%  | 54.6%            |
| Cardiovascular system                                                                                                                       | 37.4%   | 11.4%  | 51.2%            |
| Immunitary system                                                                                                                           | 59.2%   | 6.2%   | 34.6%            |

| <b>Q 24.</b> Which organs/systems can NANOPLASTICS have toxic effects on humans and other living species? (more than one answer possible)? | YES (%) | NO (%) | I'm not sure (%) |
|--------------------------------------------------------------------------------------------------------------------------------------------|---------|--------|------------------|
| Endocrine system                                                                                                                           | 71.0%   | 1.9%   | 27.0%            |
| Liver                                                                                                                                      | 76.1%   | 2.9%   | 21.1%            |
| Kidney                                                                                                                                     | 75.9%   | 3.4%   | 20.8%            |
| Sight (*)                                                                                                                                  | 31.4%   | 13.0%  | 55.6%            |
| Hypercholesterolemia                                                                                                                       | 28.3%   | 13.2%  | 58.5%            |
| Cardiovascular system                                                                                                                      | 38.8%   | 10.2%  | 51.0%            |
| Immunitary system                                                                                                                          | 61.4%   | 3.9%   | 34.8%            |

| <b>Q 27.</b>                                   | YES (%) | NO (%) | I'm not sure (%) |
|------------------------------------------------|---------|--------|------------------|
| <i>Are all types of plastics carcinogenic?</i> | 54.2%   | 11.7%  | 34.1%            |

| <b>Q 25 and Q 26.</b>                                                               | Microplastiche (%) | Nanoplastiche (%) |
|-------------------------------------------------------------------------------------|--------------------|-------------------|
| <i>A definite carcinogen</i>                                                        | 18.8%              | 21.7%             |
| <i>A probable or possible carcinogen</i>                                            | 50.7%              | 44.8%             |
| <i>Not carcinogenic to humans</i>                                                   | 0.5%               | 1.5%              |
| <i>The relevant international scientific bodies still have conflicting opinions</i> | 15.5%              | 16.8%             |
| <i>I am not sure</i>                                                                | 14.6%              | 15.3%             |

| <b>Q 37 . What does this symbol/pictogram mean? (only one answer)</b> | (%)   |
|-----------------------------------------------------------------------|-------|
| Recyclable plastic                                                    | 73.0% |
| Recycled plastic                                                      | 17.2% |
| Plastic that can be used for various purposes                         | 2.1%  |
| I am not sure                                                         | 7.7%  |

| <b>Q 38 . What does this symbol/pictogram mean? (only one answer)</b> | (%)   |
|-----------------------------------------------------------------------|-------|
| Remember to recycle the product                                       | 11.1% |
| Do not dispose of in the environment                                  | 81.7% |
| Dispose of with paper                                                 | 3.4%  |
| I am not sure                                                         | 3.8%  |

| <b>Q 39 . What does this symbol/pictogram mean? (only one answer)</b> | (%)   |
|-----------------------------------------------------------------------|-------|
| The material can be recycled, but only up to 75%                      | 23.2% |
| Material recycled for 75% of its composition                          | 60.1% |
| Material that falls within the 75% of recyclable plastics             | 7.7%  |
| I am not sure                                                         | 9.0%  |

| <b>Q 40 . What does this symbol/pictogram mean? (only one answer)</b>                                                                        | (%)   |
|----------------------------------------------------------------------------------------------------------------------------------------------|-------|
| Packaging made entirely from recycled material                                                                                               | 28.8% |
| The manufacturer participates in a specific packaging collection system, but this does not necessarily mean that the packaging is recyclable | 21.5% |
| Recyclable packaging                                                                                                                         | 15.9% |
| I am not sure                                                                                                                                | 33.9% |

**Table S3-2 Behaviours and Beliefs**

| <b>Q 28.</b> <i>How often do you buy plastic bags (non-biodegradable), such as at the supermarket checkout?</i> | %     |
|-----------------------------------------------------------------------------------------------------------------|-------|
| Never                                                                                                           | 30.1% |
| Rarely                                                                                                          | 42.8% |
| Sometimes                                                                                                       | 14.4% |
| Frequently                                                                                                      | 11.0% |
| Every time I go to the grocery store                                                                            | 1.7%  |

| <b>Q 29.</b> <i>For which of the following reasons do you buy plastic bags (non-biodegradable)?</i> | %     |
|-----------------------------------------------------------------------------------------------------|-------|
| They are comfortable                                                                                | 35.7% |
| They can be reused                                                                                  | 52.8% |
| I find them available                                                                               | 47.2% |
| They are cheap                                                                                      | 21.5% |
| They are light                                                                                      | 42.9% |
| I forgot my reusable bags/envelopes                                                                 | 70.6% |
| There are no alternatives                                                                           | 23.7% |

| <b>Q 30.</b> <i>What happens to the plastic bags (non-biodegradable) that you buy after using them?</i> | %     |
|---------------------------------------------------------------------------------------------------------|-------|
| I use them again                                                                                        | 90.2% |
| I use them for garbage storage                                                                          | 83.0% |
| I discard after a single use                                                                            | 7.5%  |
| Other                                                                                                   | 26.7% |

| <b>Q 31.</b> <i>How would you change your consumption habits if you found out that fish and seafood contain microplastics?</i> | %     |
|--------------------------------------------------------------------------------------------------------------------------------|-------|
| I would consume them as always                                                                                                 | 21.1% |
| I would reduce their consumption                                                                                               | 61.0% |
| I would never eat them again                                                                                                   | 13.1% |
| Other                                                                                                                          | 4.7%  |

| <b>Q 32.</b> <i>If you found out that toothpaste contains microplastics, how would you react?</i> | %     |
|---------------------------------------------------------------------------------------------------|-------|
| I would use it as always                                                                          | 40.9% |
| I would reduce its use                                                                            | 28.9% |
| I would never use it again                                                                        | 15.1% |
| Other                                                                                             | 15.1% |

| <b>Q 36. Which public strategies or technological solutions regarding plastic should governments adopt?</b>           | <b>YES (%)</b> | <b>NO (%)</b> | <b>I'm not sure (%)</b> |
|-----------------------------------------------------------------------------------------------------------------------|----------------|---------------|-------------------------|
| Use alternative materials instead of plastic whenever possible                                                        | 95.3%          | 1.3%          | 3.4%                    |
| Make plastic products lighter to reduce their overall quantity                                                        | 77.5%          | 8.8%          | 13.7%                   |
| Use biodegradable plastic                                                                                             | 86.4%          | 4.8%          | 8.7%                    |
| Promote the separate collection and recycling of plastic                                                              | 95.2%          | 1.7%          | 3.1%                    |
| Encourage initiatives and technological solutions for the remediation of natural environments (e.g., beaches, oceans) | 95.6%          | 1.3%          | 3.1%                    |
| Offer free reusable bags                                                                                              | 73.7%          | 14.5%         | 11.8%                   |
| Ban the sale of plastic bags                                                                                          | 78.9%          | 10.6%         | 10.6%                   |
| Educate the population                                                                                                | 97.4%          | 0.4%          | 2.2%                    |
| Improve water purification technology                                                                                 | 89.8           | 3.5%          | 6.6%                    |

**Table S3 – 3** Perceived risk of exposure to Microplastics and Nanoplastics

|                                                                                                                |       |
|----------------------------------------------------------------------------------------------------------------|-------|
| <b>Q 33.</b> . Which of the following images concerns you most regarding the negative impact of plastic waste? | %     |
| (1) Food with plastic                                                                                          | 10.8% |
| (2) City with plastic waste                                                                                    | 11.7% |
| (3) Beach with plastic waste                                                                                   | 11.7% |
| (4) Park with plastic waste                                                                                    | 0.4%  |
| (5) Animals entangled in plastic                                                                               | 37.5% |
| (6) Ocean with plastic waste                                                                                   | 32.1% |

| <b>Q 34.</b>                                                      | YES (%) | NO (%) | I'm not sure (%) |
|-------------------------------------------------------------------|---------|--------|------------------|
| <i>Do you think that Microplastics are already in our bodies?</i> | 89.6%   | 1.3%   | 8.3%             |
