# Supplementary material
Source: Royal Society of Chemistry journal article supplement (doi:10.1039/d5va00376h)
Supplement: d5va00376h4.pdf [file d5va00376h4.pdf]

**Table S4-1.** Level of correct actual knowledge on general characteristics and hazards of plastics, microplastics, and nanoplastics, stratified by risk perception groups. Mean value and standard deviation of scores values from -1 (min correctness) to +1 (max correctness).

|                                                    | Group 1<br>(29) | Group 3<br>(20) | Group 4<br>(178) | Sign. <sup>a</sup> | Sign. <sup>b</sup>                     | ( $\eta_H^2$ )<br>Effect size <sup>c</sup> |
|----------------------------------------------------|-----------------|-----------------|------------------|--------------------|----------------------------------------|--------------------------------------------|
| P1 - Plastics, overall characteristics             | 0.66±0.28       | 0.63±0.29       | 0.61±0.26        | n.s.               | -                                      | 0.006                                      |
| P2 - Plastics, advantages                          | 0.61±0.28       | 0.53±0.47       | 0.57±0.35        | n.s.               | -                                      | 0.001                                      |
| P3 - Plastics, disadvantages                       | 0.49±0.35       | 0.30±0.42       | 0.49±0.32        | n.s.               | G3 vs G4 (p<0.05)                      | 0.014                                      |
| P4 - Plastics, pittogrammes                        | 0.38±0.41       | 0.15±0.43       | 0.34±0.42        | n.s.               | G1 vs G3 (p<0.05)<br>G3 vs G4 (p<0.05) | 0.021                                      |
| MN1 - MPs/NPs, definition and sources              | 0.53±0.38       | 0.56±0.39       | 0.59±0.32        | n.s.               | -                                      | 0.002                                      |
| MN2 - MPs/NPs, contaminated environmental matrices | 0.66±0.40       | 0.56±0.35       | 0.68±0.30        | n.s.               | -                                      | 0.009                                      |
| MN3 - MPs/NPs, contaminated foods                  | 0.36±0.43       | 0.44±0.48       | 0.52±0.39        | n.s.               | G1 vs G4 (p<0.05)                      | 0.017                                      |
| MN4 - MPs/NPs, human exposure and general toxicity | 0.56±0.29       | 0.53±0.39       | 0.68±0.30        | p<0.05             | G1 vs G4 (p<0.05)<br>G3 vs G4 (p<0.05) | 0.028                                      |
| MN5 - MPs toxicity for organs and body systems     | 0.41±0.27       | 0.35±0.29       | 0.43±0.28        | n.s.               | -                                      | 0.006                                      |
| MN6 - NPs toxicity for organs and body systems     | 0.31±0.28       | 0.46±0.32       | 0.44±0.29        | n.s.               | G1 vs G3 (p<0.05)<br>G1 vs G4 (p<0.05) | 0.021                                      |
| MN7 - MPs/NPs, risk of carcinogenicity             | -0.31±0.59      | -0.69±0.63      | -0.44±0.64       | n.s.               | G1 vs G3 (p<0.05)<br>G3 vs G4 (p<0.05) | 0.023                                      |

<sup>a</sup> Kruskal-Wallis non-parametric test (comparison of three or more independent groups)

<sup>b</sup> Dunn test with Benjamini-Hochberg's correction (non-parametric post-hoc test for pairwise comparison)

<sup>c</sup> Eta squared effect size ( $\eta_H^2$ ) on Kruskal-Wallis test:

≥0.01 small

≥0.06 medium

≥0.14 large

**Table S4-2.** Use of different source to learn about health and environmental risks: % proportion of interviewed using 'often' each source stratified by risk perception groups.

|                      | <b>Group 1<br/>(29)</b> | <b>Group 3<br/>(178)</b> | <b>Group 4<br/>(20)</b> | <b>Sign.<sup>a</sup></b> | <b>Effect size<sup>b</sup></b> |
|----------------------|-------------------------|--------------------------|-------------------------|--------------------------|--------------------------------|
| TV                   | 24.1%                   | 60.0%                    | 40.9%                   | p<0.05                   | 0.169                          |
| Radio                | 10.3%                   | 53.3%                    | 15.0%                   | p<0.001                  | 0.274                          |
| Social network       | 67.9%                   | 78.9%                    | 69.1%                   | n.s.                     | 0.063                          |
| Websites             | 75.9%                   | 70.0%                    | 69.8%                   | n.s.                     | 0.045                          |
| Newspapers           | 3.4%                    | 52.6%                    | 26.8%                   | p<0.01                   | 0.264                          |
| Specialized journals | 25.0%                   | 33.3%                    | 25.0%                   | n.s.                     | 0.053                          |
| Books                | 24.1%                   | 33.3%                    | 23.4%                   | n.s.                     | 0.065                          |
| Seminars             | 24.1%                   | 22.2%                    | 11.9%                   | n.s.                     | 0.137                          |
| People               | 31.0%                   | 50.0%                    | 32.5%                   | n.s.                     | 0.106                          |

<sup>a</sup> Significant at Fisher's exact test

<sup>b</sup> Cramer's V effect size:

≥0.10 small

≥0.30 medium

≥0.50 large

**Table S4-3.** Possible public strategy or technology solutions regarding plastic that the governments should adopt: % proportion of interviewed approved each solution ('YES' response option) stratified by risk perception groups.

|                                                                             | <b>Group 1<br/>(29)</b> | <b>Group 3<br/>(178)</b> | <b>Group 4<br/>(20)</b> | <b>Sign.<sup>a</sup></b> | <b>Effect size<sup>b</sup></b> |
|-----------------------------------------------------------------------------|-------------------------|--------------------------|-------------------------|--------------------------|--------------------------------|
| Solution 1 - Use alternative materials instead of plastic whenever possible | 85.7%                   | 80.0%                    | 98.9%                   | p<0.001                  | 0.315                          |
| Solution 2 - Make plastic products lighter to reduce their overall quantity | 71.4%                   | 85.0%                    | 77.1%                   | n.s.                     | 0.074                          |
| Solution 3 - Use biodegradable plastic                                      | 85.2%                   | 80.0%                    | 86.9%                   | n.s.                     | 0.058                          |
| Solution 4 - Promote separate collection and recycling of plastic           | 85.7%                   | 90.0%                    | 97.2%                   | p<0.05                   | 0.189                          |
| Solution 5 - Encourage technologies for remediation of natural environments | 100.0%                  | 85.0%                    | 96.0%                   | n.s.                     | 0.172                          |
| Solution 6 - Offer free reusable bags                                       | 71.4%                   | 75.0%                    | 73.9%                   | n.s.                     | 0.020                          |
| Solution 7 - Ban the sale of plastic bags                                   | 67.9%                   | 85.0%                    | 79.4%                   | n.s.                     | 0.105                          |
| Solution 8 - Educate the people                                             | 92.9%                   | 90.0%                    | 98.9%                   | p<0.05                   | 0.187                          |
| Solution 9 - Improve water purification technology                          | 89.3%                   | 85.0%                    | 90.8%                   | n.s.                     | 0.056                          |

<sup>a</sup> Significant at Fisher's exact test

<sup>b</sup> Cramer's V effect size:

≥0.10 small

≥0.30 medium

≥0.50 large
